# Supplementary material for: Origin and Length Distribution of Unidirectional Prokaryotic Overlapping Genes
Source: PubMed Central journal article supplement (PMC3887535; doi:10.1534/g3.113.005652), 2013-11-05
Supplement: supp_g3.113.005652_FigureS4.pdf [file supp_g3.113.005652_FigureS4.pdf]

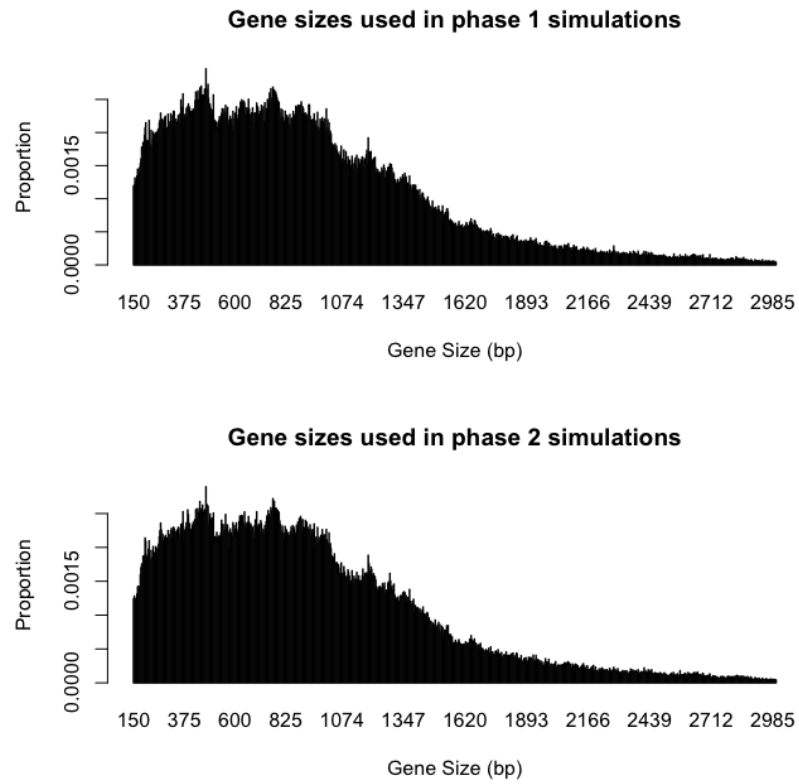

**Figure S4** Gene sizes used in the simulations (scenarios 2 and 3). The values used are not dependent of the simulated phase.
