# Supplementary material for: Origin and Length Distribution of Unidirectional Prokaryotic Overlapping Genes
Source: PubMed Central journal article supplement (PMC3887535; doi:10.1534/g3.113.005652), 2013-11-05
Supplement: supp_g3.113.005652_FigureS16.pdf [file supp_g3.113.005652_FigureS16.pdf]

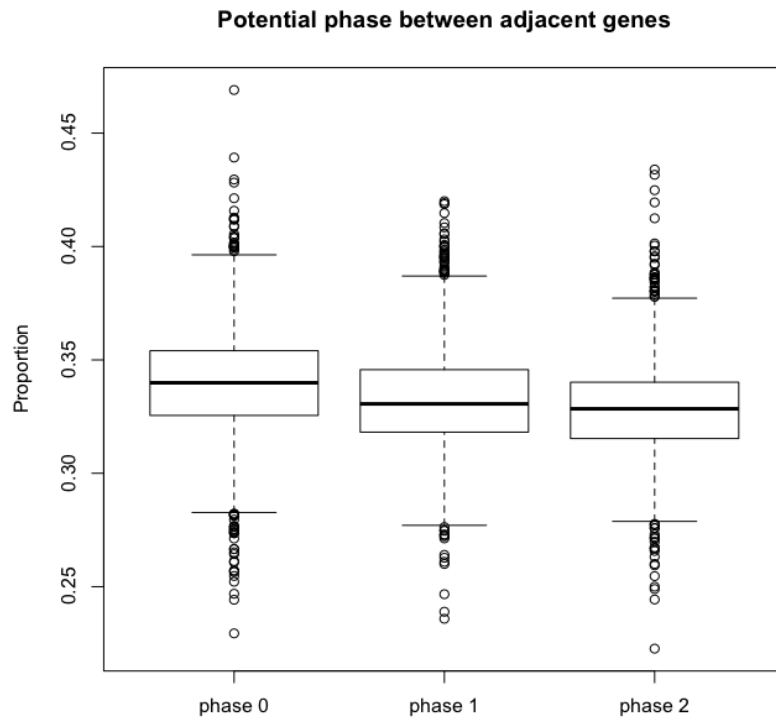

**Figure S16** Potential overlapping phase between adjacent non-overlapping gene pairs. We measured the potential overlapping phase between neighboring non-overlapping genes separated by 200 bp or less. The proportions of each phase is near 1/3, although phase 0 > phase 1 > phase 2.
