# Supplementary material for: Origin and Length Distribution of Unidirectional Prokaryotic Overlapping Genes
Source: PubMed Central journal article supplement (PMC3887535; doi:10.1534/g3.113.005652), 2013-11-05
Supplement: supp_g3.113.005652_TableS1.pdf [file supp_g3.113.005652_TableS1.pdf]

**Table S1 Proportions of prokaryotic unidirectional overlapping genes in phase 1 and phase 2.** Overall proportions of phase 1 and phase 2 overlapping genes pairs (OGP) are shown on the left side of the table and proportions of long phase 1 and phase 2 OGP on the right side. All taxon specific OGP were filtered from the non-redundant OGP database. Only unique overlap lengths for each homologous OGP were used in the comparison between long phase 1 and phase 2 overlaps (superscript a).

| Taxonomic group     | Phase 1 (%)         | Phase 2 (%) | Number of overlapping genes pairs | Phase 1 long (%)    | Phase 2 long (%) | Number of overlapping genes pairs <sup>a</sup> |
|---------------------|---------------------|-------------|-----------------------------------|---------------------|------------------|------------------------------------------------|
| Archaea             |                     |             |                                   |                     |                  | 14,243                                         |
| Crenarchaeota       | 37.5 <sup>***</sup> | 62.5        | 8,863                             | 73.2 <sup>***</sup> | 26.8             | 5,749                                          |
| Euryarchaeota       | 31.7 <sup>***</sup> | 68.3        | 16,696                            | 77.6 <sup>***</sup> | 22.4             | 8,190                                          |
| Korarchaeota        | 37.1 <sup>***</sup> | 62.9        | 321                               | 88.3 <sup>***</sup> | 11.7             | 137                                            |
| Nanoarchaeota       | 35.7 <sup>***</sup> | 64.3        | 143                               | 71.8 <sup>***</sup> | 28.2             | 71                                             |
| Thaumarchaeota      | 19.2 <sup>***</sup> | 80.8        | 442                               | 88.5 <sup>***</sup> | 11.5             | 96                                             |
| Bacteria            |                     |             |                                   |                     |                  | 155,633                                        |
| Acidobacteria       | 21.1 <sup>***</sup> | 78.9        | 4,315                             | 78.9 <sup>***</sup> | 21.1             | 1,192                                          |
| Actinobacteria      | 16.6 <sup>***</sup> | 83.4        | 61,133                            | 71.9 <sup>***</sup> | 28.1             | 15,989                                         |
| Aquificae           | 36.4 <sup>***</sup> | 63.6        | 4,141                             | 78.5 <sup>***</sup> | 21.5             | 2,081                                          |
| Bacteroidetes       | 36.3 <sup>***</sup> | 63.7        | 17,541                            | 81.9 <sup>***</sup> | 18.1             | 8,743                                          |
| Chlamydiae          | 37.1 <sup>***</sup> | 62.9        | 1,950                             | 70.7 <sup>***</sup> | 29.3             | 1,229                                          |
| Chlorobi            | 27.8 <sup>***</sup> | 72.2        | 2,097                             | 76.7 <sup>***</sup> | 23.3             | 853                                            |
| Chloroflexi         | 27.4 <sup>***</sup> | 72.6        | 4,862                             | 81.4 <sup>***</sup> | 18.6             | 1,773                                          |
| Chrysiogenetes      | 26.3 <sup>***</sup> | 73.7        | 590                               | 81.6 <sup>***</sup> | 18.4             | 190                                            |
| Cyanobacteria       | 32.1 <sup>***</sup> | 67.9        | 7,039                             | 75.3 <sup>***</sup> | 24.7             | 3,294                                          |
| Deferribacteres     | 45.6 <sup>***</sup> | 54.4        | 2,413                             | 86.4 <sup>***</sup> | 13.6             | 1,427                                          |
| Deinococcus-Thermus | 22.5 <sup>***</sup> | 77.5        | 5,574                             | 73.5 <sup>***</sup> | 26.5             | 1,927                                          |
| Dictyoglomi         | 39.3 <sup>***</sup> | 60.7        | 708                               | 79.8 <sup>***</sup> | 20.2             | 372                                            |
| Elusimicrobia       | 32.7 <sup>***</sup> | 67.3        | 376                               | 79.9 <sup>***</sup> | 20.1             | 154                                            |
| Fibrobacteres       | 29.1 <sup>***</sup> | 70.9        | 461                               | 81.0 <sup>***</sup> | 19.0             | 174                                            |
| Firmicutes          | 43.6 <sup>***</sup> | 56.4        | 50,413                            | 83.0 <sup>***</sup> | 17.0             | 35,673                                         |
| Fusobacteria        | 44.4 <sup>***</sup> | 55.6        | 1,411                             | 86.4 <sup>***</sup> | 13.6             | 778                                            |
| Gemmatimonadetes    | 14.7 <sup>***</sup> | 85.3        | 774                               | 84.4 <sup>***</sup> | 15.6             | 135                                            |
| Nitrospirae         | 27.1 <sup>***</sup> | 72.9        | 1,825                             | 75.3 <sup>***</sup> | 24.7             | 665                                            |
| Planctomycetes      | 21.7 <sup>***</sup> | 78.3        | 3,071                             | 64.4 <sup>***</sup> | 35.6             | 1,047                                          |
| Proteobacteria      | 27.6 <sup>***</sup> | 72.4        | 154,188                           | 76.3 <sup>***</sup> | 23.7             | 68,774                                         |
| Spirochaetes        | 33.5 <sup>***</sup> | 66.5        | 9,725                             | 82.0 <sup>***</sup> | 18.0             | 4,469                                          |
| Synergistetes       | 37.6 <sup>***</sup> | 62.4        | 1,520                             | 78.3 <sup>***</sup> | 21.7             | 812                                            |
| Tenericutes         | 45.6                | 54.4        | 507                               | 91.1 <sup>***</sup> | 8.9              | 257                                            |

|                 |         |      |       |         |      |       |
|-----------------|---------|------|-------|---------|------|-------|
| Thermobaculum   | 40.8*** | 59.2 | 463   | 84.9*** | 15.1 | 225   |
| Thermotogae     | 35.7*** | 64.3 | 4,908 | 78.8*** | 21.2 | 2,870 |
| Verrucomicrobia | 27.7*** | 72.3 | 1,439 | 75.3*** | 24.7 | 530   |

\*\*\* $p$  value  $\leq 0.001$
